# Supplementary material
Source: PubMed Central journal article supplement (PMC2234207)

**Log<sub>2</sub> transcript level  
in saliva/THY**

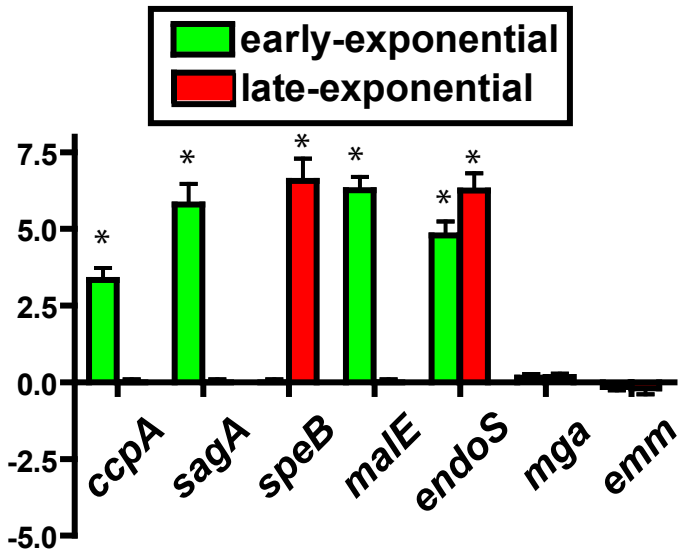

Supplement: pnas_0711767105_1.pdf [file pnas_0711767105_1.pdf]

**MGAS**  
**5005**       **$\Delta$ CcpA**

**11000**

**9000**

**6000**

**5000**

**4000**

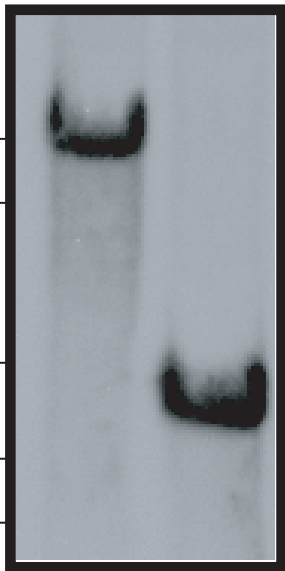

Supplement: pnas_0711767105_2.pdf [file pnas_0711767105_2.pdf]

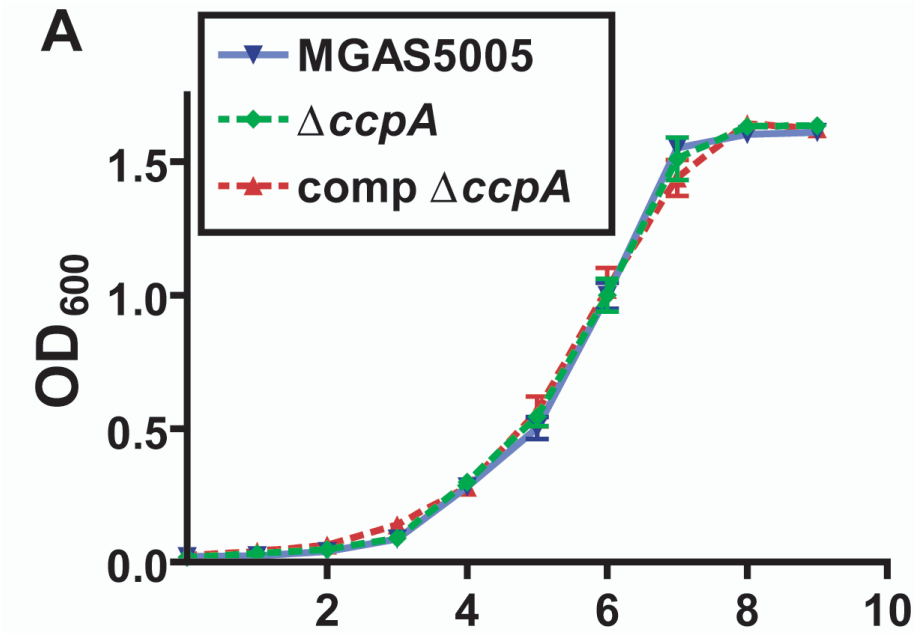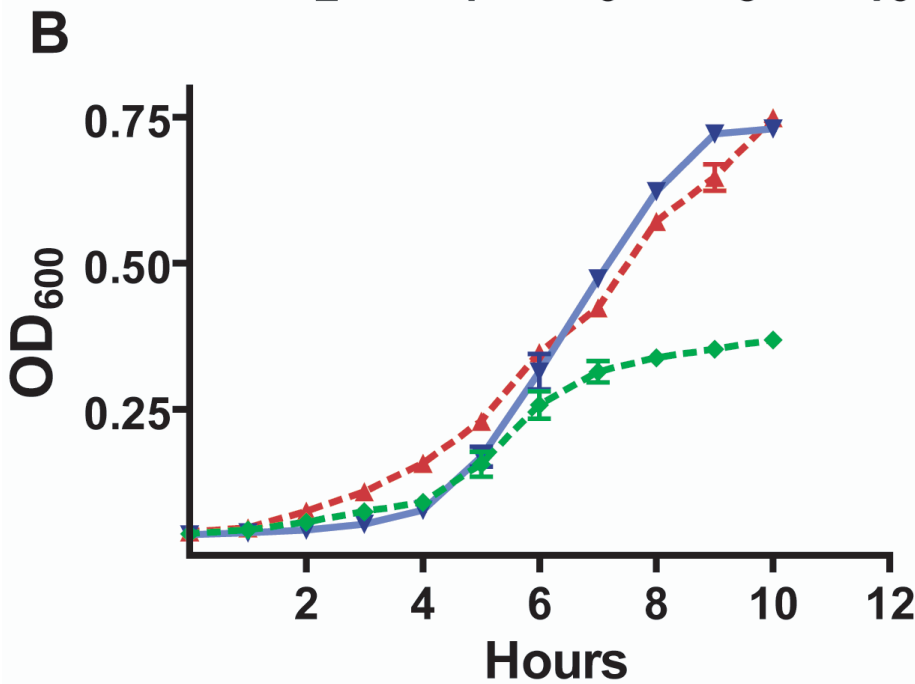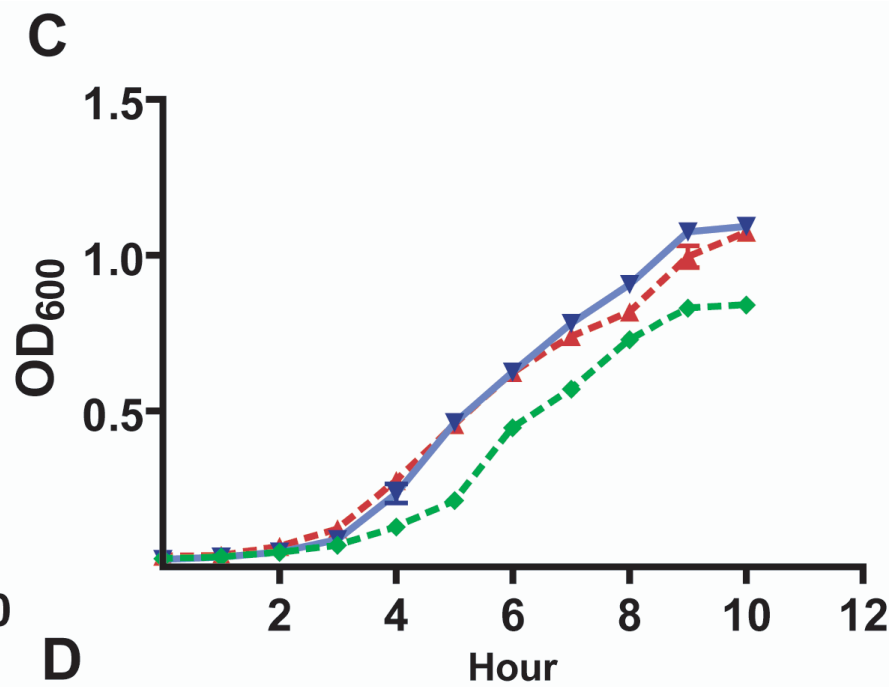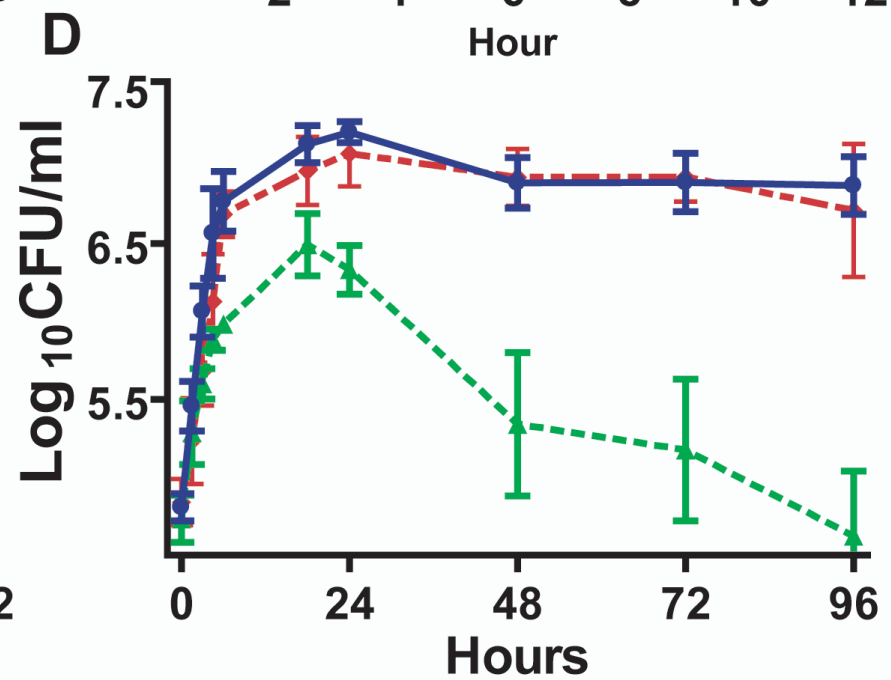

Supplement: pnas_0711767105_3.pdf [file pnas_0711767105_3.pdf]

**kDa**

**75**

**50**

**37**

**25**

**15**

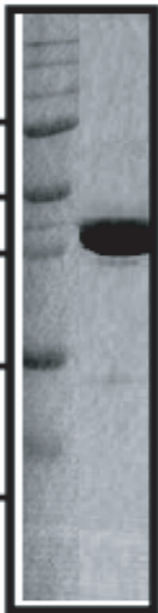

Supplement: pnas_0711767105_4.pdf [file pnas_0711767105_4.pdf]

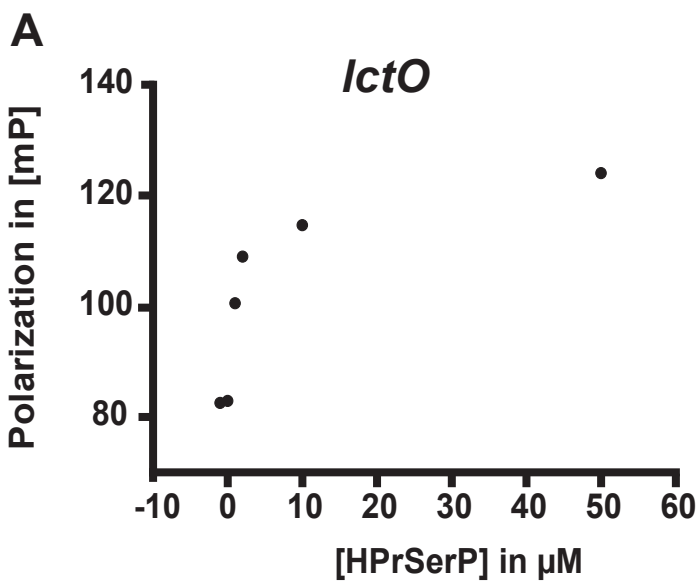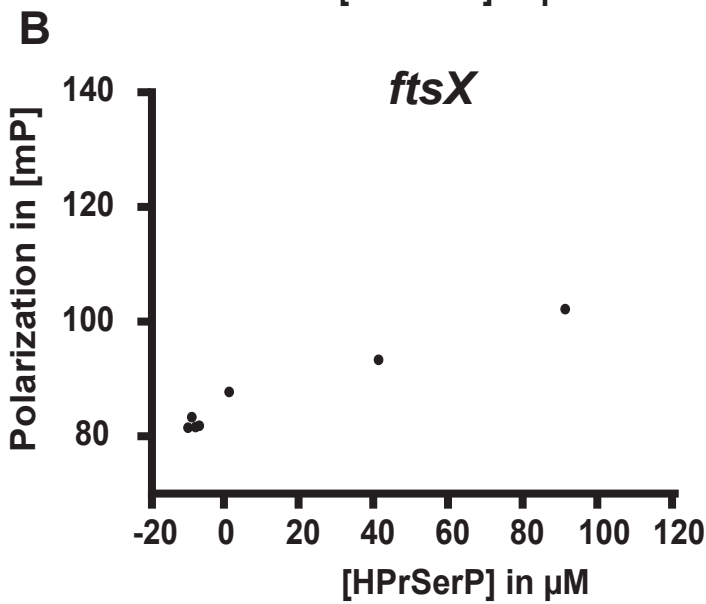

Supplement: pnas_0711767105_5.pdf [file pnas_0711767105_5.pdf]
